# Supplementary material
Source: PubMed Central journal article supplement (PMC3637885)
Supplement: NIHMS454277-supplement-supplement_1.pdf [file NIHMS454277-supplement-supplement_1.pdf]

## SUPPLEMENTAL DATA

### **AIP1 suppresses atherosclerosis progression by limiting hyperlipidemia-induced inflammation and vascular endothelial dysfunction**

Qunhua Huang<sup>1</sup>, Lingfeng Qin<sup>1</sup>, Shengchuan Dai<sup>1</sup>, Haifeng Zhang<sup>1</sup>, Satish Pasula<sup>2</sup>, Huanjiao Zhou<sup>1</sup>,  
Hong Chen<sup>2</sup>, and Wang Min<sup>1,3</sup>

<sup>1</sup>Interdepartmental Program in Vascular Biology and Therapeutics, Yale University, New Haven, CT 06520. <sup>2</sup>Cardiovascular Biology Research Program, Oklahoma Medical Research Foundation, Oklahoma City, OK 73104.

<sup>3</sup>Corresponding author: Dr. Wang Min, Interdepartmental Program in Vascular Biology and Therapeutics, Department of Pathology, Yale University School of Medicine, 10 Amistad St., 401B, New Haven, CT 06520. Tel: 203-785-6047; Fax: 203-737-2293; Email: [wang.min@yale.edu](mailto:wang.min@yale.edu)

Running title: AIP1 suppresses atherosclerosis

## SUPPLEMENTAL FIGURE LEGENDS

**Supplemental Fig.I.** ApoE<sup>-/-</sup> and DKO adult mice were fed with Western-type diet for 10 weeks.

**A-B.** AIP1 deletion increases macrophage infiltration in the aorta roots. Representative histological analysis of cross-sections from the aortic roots stained with CD68 (a macrophage marker). Scale bar: 100  $\mu$ m. Quantifications of CD68+ area are shown in **B**. Six sections (150  $\mu$ m apart for each section) per mouse from 5 mice in each group. Data are presented as mean $\pm$ SEM, \*,  $p < 0.05$ .

**C.** AIP1 deletion has no effects on smooth muscle cell contents. Representative histological analysis of cross-sections from the brachiocephalic arteries stained with  $\alpha$ -smooth muscle actin (a smooth muscle cell marker). Sections were counterstained with DAPI. Scale bar: 100  $\mu$ m. Six sections (150  $\mu$ m apart for each section) per mouse from 5 mice in each group.

**D.** AIP1 deletion has no effects on circulating monocytes. Blood circulating monocytes were measured by complete blood tests via Antech Diagnostics (Irvine, CA). Data are presented as mean $\pm$ SEM,  $n=8$ .

**Supplemental Fig.II. AIP1 deletion has no effects on the basal EC function.** ApoE<sup>-/-</sup> and DKO adult mice were fed with chow for 2 weeks, and aortas were harvested for vessel function assays.

**A.** Aortic rings were contracted with PE at a full range of doses ( $10^{-9}$ - $10^{-4}$  M). Constriction force (mN) is shown.

**B.** Aortic rings were incubated with a NOS inhibitor L-NAME to remove basal NO synthesis and then contracted with PE as in **A**.

**C.** AIP1 deletion has no effects on vessel constriction in response to KCl. Aortic rings were contracted with 50 mM of KCl.

**D.** AIP1 deletion has no effects on vessel relaxation to the NO donor drug SNP. Aortic rings were incubated with a NOS inhibitor L-NAME to remove basal NO synthesis followed by a precontraction with PE as in **A**, and were then relaxed with SNP at a full range of doses ( $10^{-9}$ - $10^{-6}$  M). Data in A-E are presented as mean $\pm$ SEM, with  $n=5$  animals and eight aortic rings per animal. No statistically significance was detected between DKO versus ApoE<sup>-/-</sup>.

**Supplemental Fig.III. AIP1 expression is low in macrophage and AIP1 deletion in macrophages does not significantly alter oxLDL-induced signaling.** Mouse aortic EC, peritoneal macrophages and bone marrow-derived macrophage were isolated from WT and AIP1-KO mice.

**A.**  $1 \times 10^6$  of peritoneal macrophages were untreated or treated with 100  $\mu\text{g/ml}$  oxLDL for the indicated times. Phospho- and total p65 and p-JNK1/2 were determined by immunoblotting with the respective antibodies. Total JNK1, AIP1 and  $\beta$ -actin were also determined. Representative blots from three independent experiments are shown. The quantification of the ratios of p-p65/p65 and p-JNK/JNK are presented from three blots, by taking untreated WT as 1.0. \*,  $p < 0.05$  indicate that statistically significant by comparing AIP1-KO versus WT.

**B.**  $1 \times 10^6$  of cells were untreated or treated with 100  $\mu\text{g/ml}$  oxLDL for 12 h. AIP1 mRNA expression was determined by qRT-PCR. Data represent fold changes where aortic EC is set as 1.0. Data are mean  $\pm$  SEM from 3 independent experiments. AIP1 expression was not altered by oxLDL treatment. \*,  $p < 0.05$  comparing EC to macrophages.

**A**

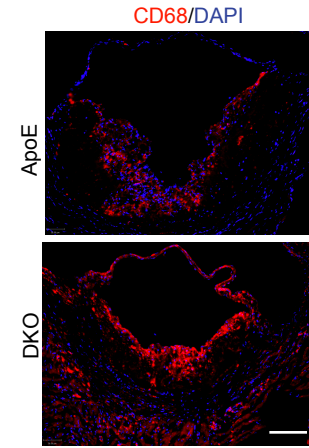

**B**

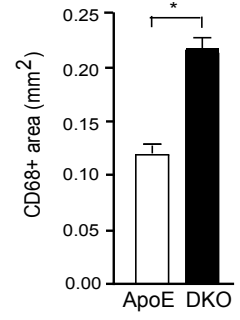

**C**

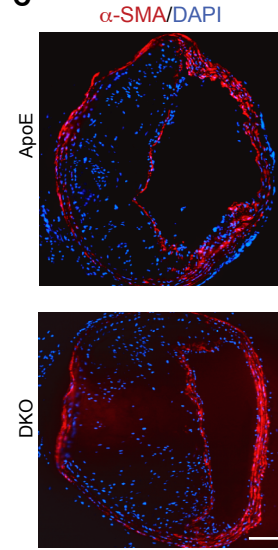

**D**

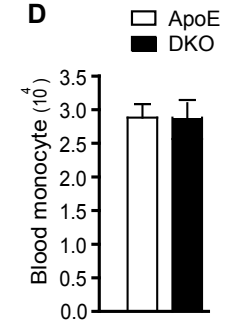

Huang, Q. et al Suppl Fig.II

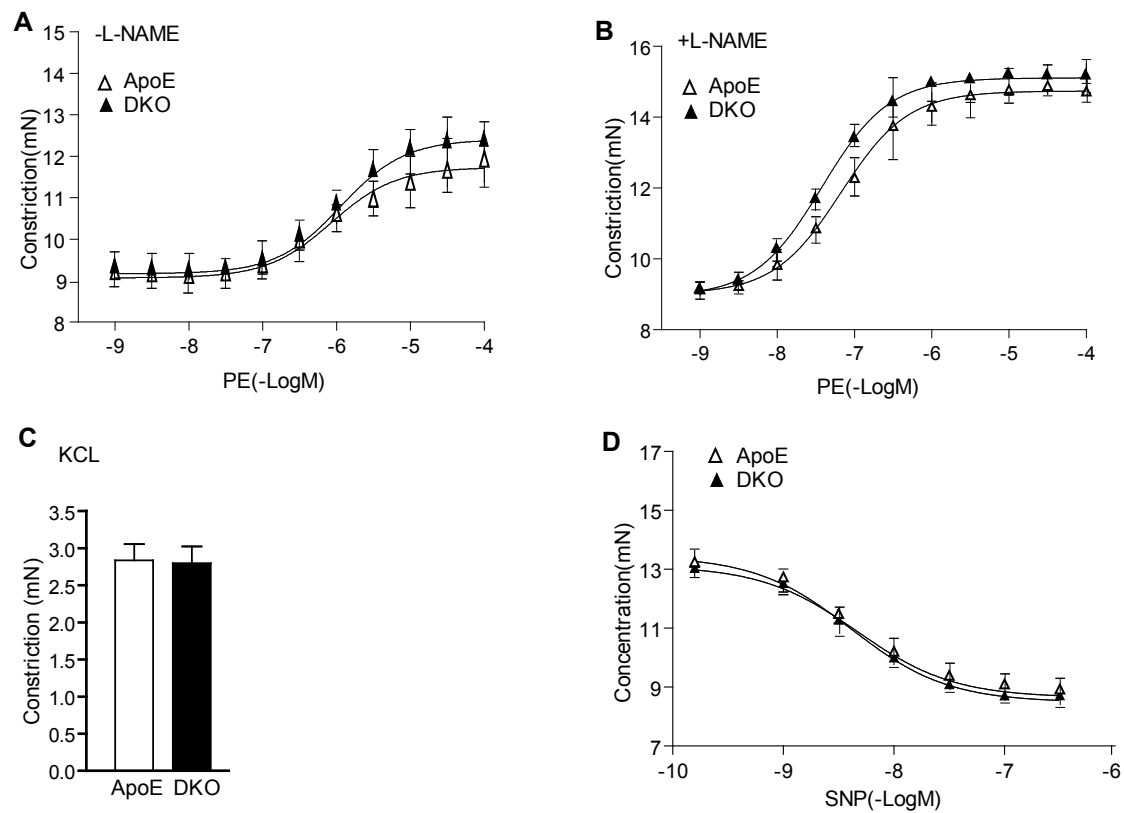

Huang, Q. et al Fig.III

**A** Peritoneal macrophage

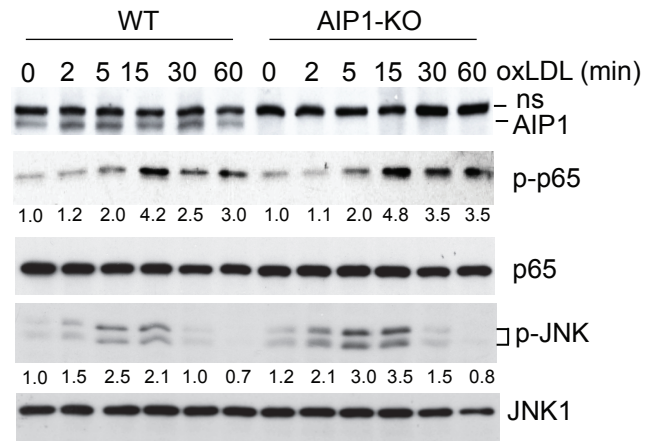

**B**

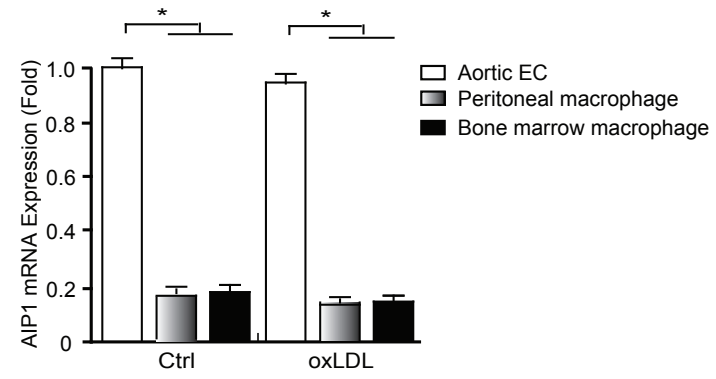

**Supplemental Table I.**

|                                               | Hemoglobin<br>(g/dL) | Hematocrit<br>(%) | RBC<br>(10 <sup>6</sup> /μl) | Platelet<br>(10 <sup>6</sup> /μl) | WBC<br>(10 <sup>3</sup> /μl) | Neutrophil<br>(10 <sup>3</sup> /μl) | Lymphocyte<br>(10 <sup>3</sup> /μl) | Monocyte<br>(10 <sup>3</sup> /μl) |
|-----------------------------------------------|----------------------|-------------------|------------------------------|-----------------------------------|------------------------------|-------------------------------------|-------------------------------------|-----------------------------------|
| <b>Basal</b>                                  |                      |                   |                              |                                   |                              |                                     |                                     |                                   |
| ApoE <sup>-/-</sup>                           | 13.8                 | 38                | 8.7                          | 1.1                               | 3.7                          | 0.89                                | 2.2                                 | 0.045                             |
| DKO                                           | 13.4                 | 39                | 8.6                          | 0.9                               | 3.9                          | 0.93                                | 2.1                                 | 0.050                             |
| <b>BMT</b>                                    |                      |                   |                              |                                   |                              |                                     |                                     |                                   |
| ApoE <sup>-/-</sup> to<br>ApoE <sup>-/-</sup> | 14.6                 | 40.5              | 10.4                         | 1.1                               | 3.6                          | 0.90                                | 1.9                                 | 0.050                             |
| DKO to<br>ApoE <sup>-/-</sup>                 | 14.9                 | 40.8              | 10.6                         | 1.2                               | 3.7                          | 0.99                                | 2.2                                 | 0.053                             |

**Table I. Complete blood tests in ApoE<sup>-/-</sup> and DKO mice.** Peripheral blood from basal ApoE<sup>-/-</sup>, DKO, and BMT mice were collected.

Complete blood tests were performed via Antech Diagnostics (Irvine, CA). RBC: red blood cell; WBC: white blood cell.
